# Supplementary material for: 4E-BP1–dependent translation in nociceptors controls mechanical hypersensitivity via TRIM32/type I interferon signaling
Source: PubMed Central journal article supplement — Sci Adv. 2023 Nov 3;9(44):eadh9603. doi: 10.1126/sciadv.adh9603 (PMC10624345; doi:10.1126/sciadv.adh9603), 2023-11-03
Supplement: sciadv.adh9603_sm.pdf [file sciadv.adh9603_sm.pdf]

Supplementary Materials for  
**4E-BP1–dependent translation in nociceptors controls mechanical hypersensitivity via TRIM32/type I interferon signaling**

Calvin Wong *et al.*

Corresponding author: Arkady Khoutorsky, [arkady.khoutorsky@mcgill.ca](mailto:arkady.khoutorsky@mcgill.ca); Christos G. Gkogkas, [cgkogkas@bri.forth.gr](mailto:cgkogkas@bri.forth.gr)

*Sci. Adv.* **9**, eadh9603 (2023)  
DOI: 10.1126/sciadv.adh9603

**The PDF file includes:**

Figs. S1 to S3  
Legend for data S1

**Other Supplementary Material for this manuscript includes the following:**

Data S1



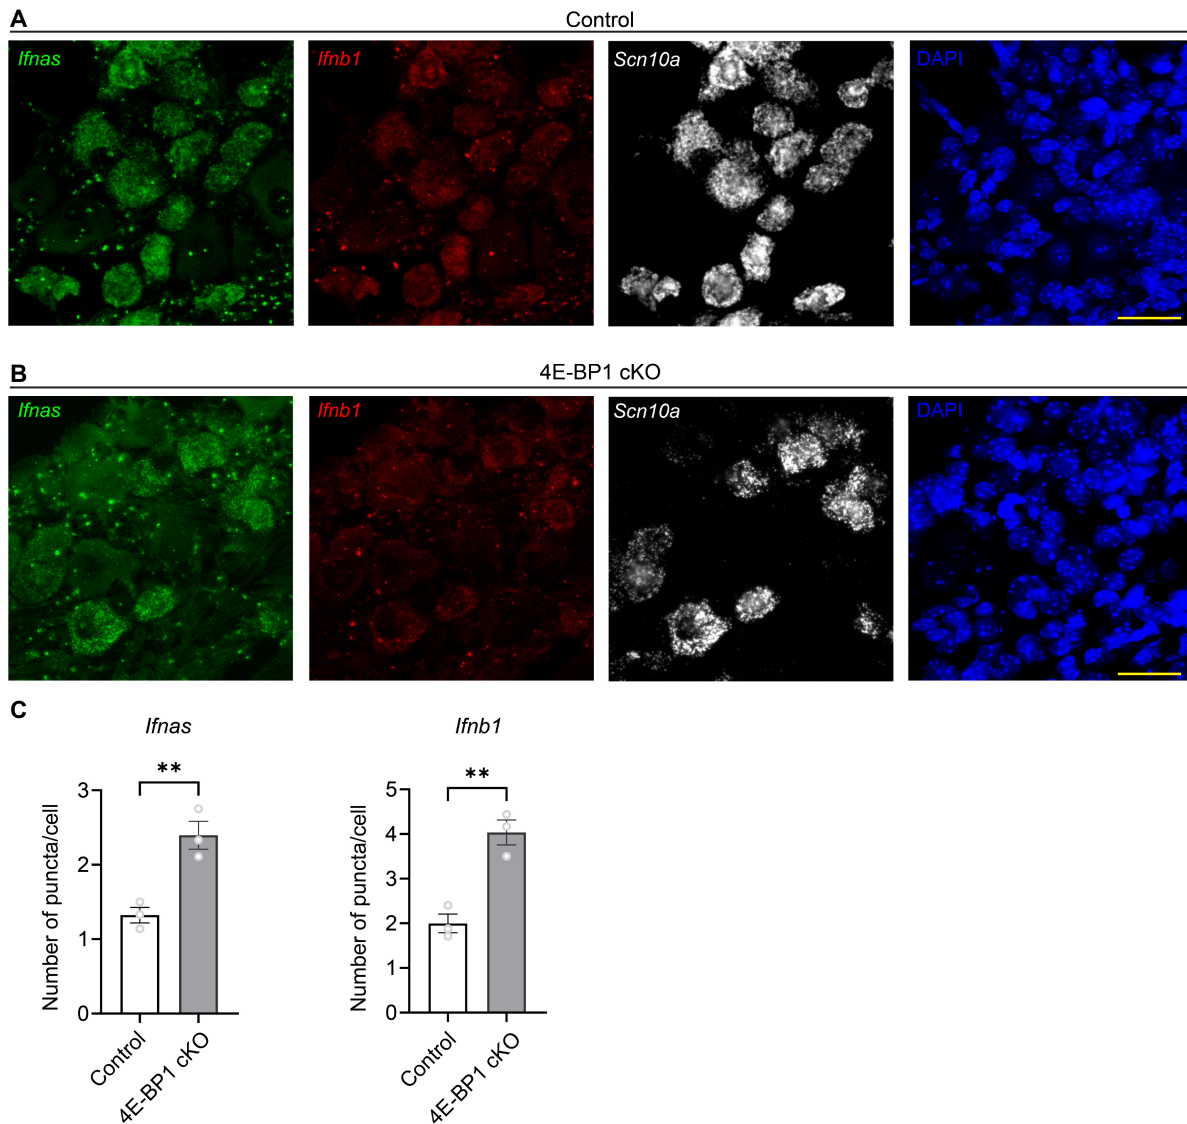

**fig. S2. Type I interferon mRNAs are increased in 4E-BP1 cKO nociceptors.** RNAScope images of DRG sections show increased abundance (# of puncta per cell) of *Ifnas* and *Ifnb1* mRNAs in *scn10a*-positive nociceptors of 4E-BP1 cKO mice (A) as compared to control (B) animals. (C) Quantification (n = 3 mice/group; Student's t-test, 2 tailed; scale bar: 30  $\mu$ m). All data are presented as mean  $\pm$  SEM. \*\*P < 0.01.

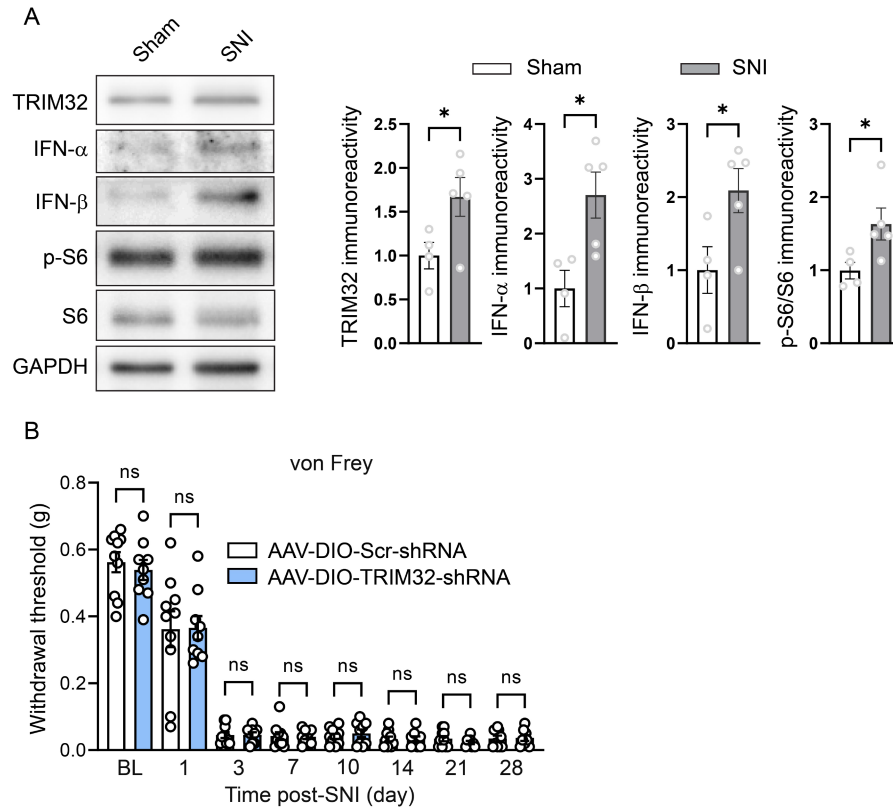

**fig. S3. shRNA knockdown of TRIM32 in nociceptors does not rescue neuropathic pain.** (A) Western blots and quantification showing increased TRIM32, IFN- $\alpha$ , IFN- $\beta$  and p-S6 in DRG lysates of animals 4 days after SNI compared to sham control mice ( $n = 4-5$  mice per group, Student's t-test, 2 tailed). (B) No difference in mechanical hypersensitivity in animals that received AAV-DIO-TRIM32-shRNAmir compared to scrambled control following SNI ( $n = 8$  mice per group, two-way ANOVA mixed effects model followed by Bonferroni's post hoc comparison). All data are presented as mean  $\pm$  SEM. \* $P < 0.05$ .



**Data S1. Analysis of TRAP-sequencing data. Tab A:** Raw transcripts per million for INPUT and respective percentiles. **Tab B:** Raw transcripts per million for IP and respective percentiles. **Tab C:** Quantile normalized transcripts per million for IP and respective statistics. **Tab D:** Summary of differentially expressed genes between WT and 4E-BP1 cKO in IP samples.
